# Supplementary material for: Morphological Identification and Phylogenetic Analysis of Laelapin Mite Species (Acari: Mesostigmata: Laelapidae) from China
Source: PubMed Central journal article supplement — Korean J Parasitol. 2022 Aug 24;60(4):273–9. doi: 10.3347/kjp.2022.60.4.273 (PMC9441453; doi:10.3347/kjp.2022.60.4.273), 2022-08-24
Supplement: kjp-60-4-273-suppl1.pdf [file kjp-60-4-273-suppl1.pdf]

**Supplementary Table S1.** *Cox1* gene GenBank accession number used in this study

| Genus                  | Species                        | Country                  | Host                           | Accession no.         | Length | A+T% |
|------------------------|--------------------------------|--------------------------|--------------------------------|-----------------------|--------|------|
| <i>Laelaps</i>         | <i>Laelaps fukienensis</i>     | China                    | <i>Niviventer fulvescens</i>   | OL806574 (This study) | 438    | 72.4 |
|                        | <i>Laelaps chini</i>           | China                    | <i>Eothenomys miletus</i>      | OL806586 (This study) | 438    | 71.4 |
|                        | <i>Laelaps schatzi</i>         | Argentina                | <i>Oligoryzomys flavescens</i> | MK716211              | 620    | 72.7 |
|                        | <i>Laelaps agilis</i>          | Lithuania                | <i>Myodes glareolus</i>        | MZ048462              | 582    | 74.6 |
|                        | <i>Laelaps echidninus</i>      | China                    | <i>Rattus tanezumi</i>         | OL780835 (This study) | 421    | 73.1 |
|                        | <i>Laelaps nuttalli</i>        | China                    | <i>Rattus nitidus</i>          | OL810027 (This study) | 418    | 73.2 |
|                        | <i>Laelaps muricola</i>        | South Africa             | <i>Myotis muricola</i>         | KU166786              | 644    | 73.0 |
|                        | <i>Laelaps giganteus</i>       | South Africa             | <i>Rhabdomys dilectus</i>      | KU166639              | 644    | 71.4 |
|                        | <i>Laelaps kochi</i>           | Canada                   | <i>Oligoryzomys flavescens</i> | MG414008              | 653    | 71.5 |
|                        | <i>Laelaps taingueni</i>       | China                    | <i>Mus musculus</i>            | KF437542              | 658    | 71.0 |
| <i>Laelaps hilaris</i> | Lithuania                      | <i>Apodemus agrarius</i> | MZ048456                       | 582                   | 72.0   |      |
| <i>Haemolaelaps</i>    | <i>Haemolaelaps traubi</i>     | China                    | <i>Callosciurus erythraeus</i> | OL810029 (This study) | 440    | 71.8 |
| <i>Neocypholaelaps</i> | <i>Neocypholaelaps apicola</i> | Hungary                  | <i>Apis mellifera</i>          | KP966315              | 709    | 72.9 |
|                        | <i>Neocypholaelaps indica</i>  | China                    | <i>Apis mellifera</i>          | MF040695              | 707    | 70.3 |
| <i>Tropilaelaps</i>    | <i>Tropilaelaps thaii</i>      | China                    | <i>Apis laboriosa</i>          | EF025452              | 538    | 67.3 |
|                        | <i>Tropilaelaps clareae</i>    | Philippines              | <i>Apis mellifera</i>          | EF025458              | 538    | 68.8 |
|                        | <i>Tropilaelaps mercedesae</i> | Indonesia                | <i>Apis dorsata</i>            | KY865195              | 672    | 65.9 |
|                        | <i>Tropilaelaps koenigerum</i> | China                    | <i>Apis laboriosa</i>          | EF025449              | 538    | 67.5 |
| <i>Androlaelaps</i>    | <i>Androlaelaps casalis</i>    | France                   | Poultry                        | MH983844              | 657    | 61.0 |
|                        | <i>Androlaelaps sp.</i>        | France                   | Poultry                        | MH983812              | 658    | 69.5 |
| <i>Hyperlaplaes</i>    | <i>Hyperlaplaes microti</i>    | Lithuania                | <i>Microtus arvalis</i>        | MZ048468              | 582    | 72.3 |
